1 **The impact of the COVID-19 pandemic on the provision & utilisation of primary health care**  
2 **services in Goma, Democratic Republic of the Congo, Kambia district, Sierra Leone & Masaka**  
3 **district, Uganda**

4

5 K Kasonia<sup>+1</sup> & D Tindanbil<sup>+2</sup>, J Kitonsa<sup>3</sup>, K Baisley<sup>4</sup>, F Zalwango<sup>3</sup>, L Enria<sup>2</sup>, A Mansaray<sup>2</sup>, M James<sup>1</sup>, Y  
6 Nije<sup>2</sup>, D Tetsa Tata<sup>1</sup>, B J Lawal<sup>2</sup>, A Drammeh<sup>2</sup>, B Lowe<sup>4</sup>, D Mukadi-Bamuleka<sup>5</sup>, S Mounier-Jack<sup>4</sup>, F  
7 Nakiyimba<sup>6</sup>, P Obady<sup>7</sup>, J Muhavi<sup>7</sup>, J S Bangura<sup>8,9</sup>, B Greenwood<sup>4</sup>, M Samai<sup>8</sup>, B Leigh<sup>8</sup>, D Watson-  
8 Jones<sup>+4,10</sup> & H Kavunga-Membo<sup>+5</sup> & E Ruzagira<sup>+3</sup> & K E. Gallagher<sup>+4,11\*</sup>

9 **\* Contributed equally**

10

11 **Affiliations**

12 <sup>1</sup> LSHTM-INRB Research Partnership, Goma, Democratic Republic of the Congo

13 <sup>2</sup> LSHTM-COMAHS Research Partnership, Kambia, Sierra Leone

14 <sup>3</sup> MRC/UVRI and LSHTM Uganda Research Unit, Entebbe, Uganda

15 <sup>4</sup> London School of Hygiene & Tropical Medicine (LSHTM), London, United Kingdom

16 <sup>5</sup> Laboratoire Rodolphe Merieux-Institute National Research biomedical (INRB), Goma, Democratic  
17 Republic of the Congo

18 <sup>6</sup> Ministry of Health, Masaka District, Uganda

19 <sup>7</sup> Ministry of Health, Goma, Democratic Republic of Congo

20 <sup>8</sup> University of Sierra Leone College of Medicine and Allied Health Sciences (COMAHS), Freetown,  
21 Sierra Leone

22 <sup>9</sup> Ministry of Health, Kambia District, Sierra Leone

23 <sup>10</sup> Mwanza Intervention Trials Unit, National Institute for Medical Research, Mwanza, Tanzania

24 <sup>11</sup> KEMRI-Wellcome Trust Research Programme, Kilifi, Kenya

25

26

27 **\*Corresponding author:** Katherine Gallagher, Department of Infectious Disease Epidemiology,  
28 Faculty of Epidemiology and Population Health, London School of Hygiene and Tropical Medicine,  
29 Keppel Street, London, WC1E 7HT, United Kingdom. Email: [Katherine.gallagher@lshtm.ac.uk](mailto:Katherine.gallagher@lshtm.ac.uk)

30

31 **Abstract word count: 299/300**

32 **Word count: 3837/ 5000**

33 **Key words: pandemic, primary care, covid, impact**

34 **Abstract**

35 **Introduction**

36 This study aimed to determine whether the COVID-19 pandemic had an impact on the number of  
37 people seen at public facilities in Uganda, the Democratic Republic of the Congo (DRC) and Sierra  
38 Leone for essential primary healthcare services.

39 **Methods**

40 The number of weekly consultations for antenatal care (ANC), outpatient (OPD), expanded  
41 programme on immunisations (EPI), family planning (FP) services and HIV, for the period of January  
42 2018-December 2020, were collected from 25 primary healthcare facilities in Masaka district,  
43 Uganda, 21 health centres in Goma, DRC, and 29 facilities in Kambia district, Sierra Leone. Negative  
44 binomial regression models accounting for facility level clustering and season were used to analyse  
45 changes in activity levels between 2018, 2019 and 2020.

46 **Results**

47 We found no evidence that the COVID-19 pandemic affected the number of OPD, EPI or ANC  
48 consultations in Goma. Family planning consultations were 17% lower in March-July 2020 compared  
49 to 2019, but this recovered by December 2020. New diagnoses of HIV were 34% lower throughout  
50 2020 compared to 2019. Compared to the same periods in 2019, facilities in Sierra Leone had 18-  
51 29% fewer OPD consultations throughout 2020, and 27% fewer DTP3 doses in March-July 2020, but  
52 this had recovered by Jul-Dec. There was no evidence of differences in other services. In Uganda  
53 there were 20-35% fewer under-5 OPD consultations, 21-66% fewer MCV1 doses, and 48-51% fewer  
54 new diagnoses of HIV, throughout 2020, compared to 2019. There was no difference in the number  
55 of HPV doses delivered in 2020 compared to 2019.

56 **Conclusions**

57 The level of disruption appeared to correlate with the strength of lockdown measures in the  
58 different settings and community attitudes towards the risk posed by COVID-19. Mitigation  
59 strategies such as health communications campaigns and outreach services proved important to  
60 limit the impact of lockdowns on primary healthcare services.

61 **Key messages**

62 **What is already known on this topic:** The COVID-19 pandemic and the response measures put in  
63 place caused disruption to the provision and utilisation of primary healthcare services worldwide.

64 **What this study adds:** We document that the COVID-19 pandemic had a varied impact on different  
65 services in three distinct settings on the African continent. The extent that the pandemic impacted  
66 services correlated with the stringency of the lockdowns, community perceptions of the level of  
67 danger posed by the pandemic and communities' prior exposure to Ebola epidemics and  
68 concomitant response measures.

69 **How this study might affect research, practice, or policy:** strategies such as communication  
70 campaigns and outreach services limited the impact of lockdowns on essential services and would be  
71 valuable strategies to implement in future epidemics.

## 72 Introduction

73 The World Health Organization (WHO) pulse surveys reported that the COVID-19 pandemic  
74 affected the provision and utilization of essential primary healthcare services in >90% of countries  
75 worldwide. In the first survey, conducted between May and July 2020, 25 essential services were  
76 assessed in 105 countries. Nearly all countries reported either partial (5%-50%) or severe (>50%)  
77 change in service provision or use. Low and lower-middle income countries were more affected than  
78 countries in higher income brackets(1). In the second survey, conducted between January and  
79 March 2021, 94% of the 135 countries that took part in the survey reported residual service  
80 disruption(2). In response to the pandemic, various containment measures such as social distancing,  
81 lockdowns, curfews, closure of schools and bans on gatherings were instituted across the globe(3).  
82 Fewer transport options and less disposable income during lockdowns, alongside fears and  
83 misconceptions around the risk and feasibility of accessing services could have reduced utilisation of  
84 primary care. Healthcare resources, including staff, facilities, consumables, treatments, personal  
85 protective equipment, were re-prioritised to fight the disease, social distancing measures were put  
86 in place in facilities, and many of the workforce fell sick, reducing the capacity to provide essential  
87 health services in many settings(1).

88 Literature reviews have already documented that COVID-19 had a considerable impact on  
89 primary healthcare at both the service and patient level(4, 5); however, almost all studies are from  
90 Europe or the USA. The UK reported a 20% reduction in measles vaccinations, three weeks after  
91 social distancing measures were announced(6). In the USA, the timing of the pandemic correlated  
92 with a significant decrease in women arriving at a large, regional referral hospital with a  
93 contraception plan(7). A meta-analysis of 14 studies from countries in Europe, Asia and one in Africa  
94 reported a 33% increase in the rate of stillbirth during lockdown (95% CI 1.04, 1.69)(5). There is a  
95 paucity of information about the impact of the pandemic on the provision and utilization of primary  
96 healthcare services in low- and middle-income countries (LMICs), especially in Africa. A study in  
97 Rwanda documented a significant decrease in utilization of antenatal care, facility-based deliveries,  
98 post-natal care and vaccinations when comparing April-May 2020 with April-May 2019(8). In  
99 Uganda, a 75% reduction in HIV testing and initiation of antiretroviral treatment was reported in the  
100 first three weeks of April 2020 compared to the weekly average for the period from Jan-Mar  
101 2020(9).

102 The first case of SARS-CoV-2 infection in the Democratic Republic of the Congo (DRC) was  
103 identified on 10<sup>th</sup> March 2020. From the 18<sup>th</sup> March onwards, in response to the pandemic, the  
104 government put in place movement restrictions, closure of public spaces, limitations on gatherings  
105 and compulsory wearing of masks in public (10). The first case of SARS-CoV-2 infection in Sierra

106 Leone was recorded on 30<sup>th</sup> March 2020(11). The President of the Republic of Sierra Leone declared  
107 a public health emergency for twelve months and imposed a dusk to dawn curfew, movement  
108 restrictions, bans on public gatherings, school closures, and compulsory wearing of masks. The first  
109 case of SARS-CoV-2 infection was confirmed in Uganda on 21<sup>st</sup> March 2020(12). Subsequently, the  
110 Ministry of Health imposed movement restrictions, closure of public spaces and schools, gatherings  
111 were limited, and masks were made compulsory in public. All these measures may have affected  
112 effective provision and utilization of primary health services in these countries.

113 We aimed to determine in what ways and to what extent the pandemic impacted provision  
114 and utilization of primary healthcare services in 2020 in three distinct settings with different  
115 documented burdens of COVID-19 and different lockdown measures. We focus on the number of  
116 people seen at healthcare facilities for antenatal care, under-5 outpatient services, routine  
117 immunisations, family planning and HIV treatment services, using routine health registration data.  
118 Qualitative data were collected and inform the discussion of the data presented in this paper but are  
119 reported separately. A French translation of this manuscript is provided in supplementary files.

120

## 121 **Methods**

### 122 Study setting & health facility selection

123 The study was conducted in three areas, Goma, in the Democratic Republic of the Congo,  
124 Kambia District, north-western Sierra Leone, and Masaka District, south-western Uganda (**Table 1,**  
125 **2**). District/ regional authorities were approached for approval to conduct the study and complete  
126 lists of health facilities in each area were compiled. Private health facilities were excluded from  
127 selection, as the aim of the project was to inform the provision of public health services. A selection  
128 of health centres was made to include all 25 available government health centres in Masaka, all 21  
129 accessible health centres in urban Goma; and a random number generator was used to select a  
130 representative selection of 29 health facilities in Kambia, proportional to the total number of health  
131 posts and health centres in the district.

132

### 133 Data collection

134 Trained staff visited each of the selected facilities and collected general information from  
135 the head of each health facility, detailing: the facility location, the number of staff members, the  
136 services provided and estimated catchment population, and any other known service disruptions  
137 over the study period. Project staff then tallied weekly counts of the number of consultations in the  
138 registration book for each service from January 2018 to December 2020. Data were entered directly  
139 onto an electronic REDcap database on computer tablets(13, 14). Data were collected on the weekly

140 number of under-5 outpatient department (OPD) consultations, first antenatal care (ANC) visits,  
 141 third doses of the diphtheria-tetanus-pertussis (DTP3) vaccine delivered, first doses of measles-  
 142 containing vaccine (MCV1) delivered, first doses of human papillomavirus vaccine (HPV1) delivered,  
 143 family planning (FP) consultations, new HIV diagnoses and HIV care visits (including for ART  
 144 replenishment). If data were available on the probable diagnosis at the OPD visit, the numbers of  
 145 children diagnosed with respiratory diseases and probable malaria were noted, and this was further  
 146 broken down by whether the child was referred for admission or treated as an outpatient.

147

148 **Table 1. The study setting and selected health centres**

149

| Country             | Selected region/district | Description and total population                             | Total public health facilities in the area          | Selected facilities for quantitative data collection                                              | Selected facilities for qualitative interviews |
|---------------------|--------------------------|--------------------------------------------------------------|-----------------------------------------------------|---------------------------------------------------------------------------------------------------|------------------------------------------------|
| <b>DRC</b>          | Goma                     | Urban and suburban; estimated population: 600,000- 1 million | 39 (26 health centres, 13 tertiary care hospitals)  | 21 (21 health centres <sup>1</sup> )                                                              | 12                                             |
| <b>Sierra Leone</b> | Kambia                   | Suburban and rural; estimated population: 350,000            | 68 (55 health posts, 15 health centres, 1 hospital) | 29 (22 health posts, 6 health centres, 1 hospital with a primary health care dept. <sup>2</sup> ) | 15                                             |
| <b>Uganda</b>       | Masaka                   | Rural; estimated population: 307,000                         | 26 (25 health facilities, 1 referral Hospital)      | 25 (14 level II, 9 level III, 2 level IV health centres <sup>3</sup> )                            | 15                                             |

150

151

<sup>1</sup> In Goma, health centres provide primary healthcare to the urban population; 21 of the 26 public health centres were selected due to security and logistical constraints during data collection.

152

153

<sup>2</sup> In Kambia, health posts, community health centres and some hospitals provide primary care to the population. Health posts (community or maternal child health posts) are small and provide services in remote rural settings; community health centres are larger, based in central locations within each chiefdom and can have laboratory and more consistent cold chain services. Kambia district hospital was included as the dominant public primary health care provider within Kambia town.

154

155

156

<sup>3</sup> In Masaka, level II health facilities provide outpatient services to the surrounding parish, Level III facilities are slightly larger sub-county facilities which may have maternity wards, and level IV facilities have inpatient and outpatient services.

157

158

159

160

Sample size estimation and statistical analysis

161

The Health Management Information System (HMIS) data for Masaka District, Uganda, was used to estimate the sample size required for the study to detect a relative change of 30% when comparing a single week in 2020 with the same week the year before. Assuming an average of 157 OPD visits per week, with a standard deviation of 73, a sample of at least 20 facilities per period would enable the study to detect a relative change of 30% with 80% power at the 5% significance level.

162

163

164

The period of analysis was from the 1<sup>st</sup> January 2018 to the 27<sup>th</sup> December 2020. Data availability was assessed as the number of facilities with data for each week of analysis, this was

169 plotted over time for each area, by service. The average number of consultations per facility with  
 170 data, per week, was calculated and plotted against time for each service in each area. A pre-  
 171 pandemic period was defined as January-March 2020 (**Table 2**). Distinct periods of the pandemic  
 172 were defined using the reported ‘waves’ of COVID-19 using Ministry of Health (MOH) data in each  
 173 area, reported lockdown measures, and the estimated ‘stringency’ of the lockdown in each  
 174 setting(3) (**Table 2**). For each defined period of analysis, negative binomial regression was used to  
 175 estimate the relative change in count, comparing 2018, 2019 and 2020, using robust standard errors  
 176 to adjust for autocorrelation and controlling for ‘month’ as a season parameter. Clinic level random  
 177 effects were included to account for between clinic differences and within-clinic clustering of data.  
 178 Climate data from the nearest available weather station were downloaded and assessed in the  
 179 model as a potential confounder.

180

181 **Table 2. Definition of periods of analysis based on the COVID pandemic and lockdown measures.**

182

| Area   | Period | Approx. dates in the period (2018-20) <sup>1</sup>     | N (weeks/year) | Description of lockdown measures in place in 2020                                                                                         | Mean lockdown stringency index for the period(3) | National number of reported COVID-19 cases(15) | National number of cases per 1 million population |
|--------|--------|--------------------------------------------------------|----------------|-------------------------------------------------------------------------------------------------------------------------------------------|--------------------------------------------------|------------------------------------------------|---------------------------------------------------|
| Goma   | 0      | 1 <sup>st</sup> January – 22 <sup>nd</sup> March       | 12             | Pre-COVID                                                                                                                                 | 0                                                |                                                |                                                   |
|        | 1      | 23 <sup>rd</sup> March – 19 <sup>th</sup> July         | 17             | First wave of reported cases peaks. State of emergency (declared 18 <sup>th</sup> March), stay at home order for 14 days, schools closed. | 80                                               | 8443                                           | 94.3                                              |
|        | 2      | 20 <sup>th</sup> July – 18 <sup>th</sup> October       | 12             | Limitations on gatherings lifted, public places reopened.                                                                                 | 49                                               | 2557                                           | 28.6                                              |
|        | 3      | 19 <sup>th</sup> October – 27 <sup>th</sup> December   | 10             | Cases begin to rise in second wave. Low stringency lockdown, restrictions start to be implemented again mid-December.                     | 26                                               | 5839                                           | 65.2                                              |
| Kambia | 0      | 1 <sup>st</sup> January – 15 <sup>th</sup> March       | 11             | Pre-COVID                                                                                                                                 | 0                                                |                                                |                                                   |
|        | 1      | 16 <sup>th</sup> March – 19 July                       | 18             | First wave of reported infections. Gatherings of over 100 banned, state of emergency (declared 31 March).                                 | 60                                               | 1711                                           | 214.5                                             |
|        | 2      | 20 <sup>th</sup> July – 27 <sup>t</sup> December       | 22             | Low number of cases and low stringency lockdown measures.                                                                                 | 33                                               | 849                                            | 106.4                                             |
| Masaka | 0      | 1 <sup>st</sup> January – 15 <sup>th</sup> March       | 11             | Pre-COVID                                                                                                                                 | 0                                                |                                                |                                                   |
|        | 1      | 16 <sup>th</sup> March – 20 <sup>th</sup> September    | 26             | Gatherings restricted, schools closed, nationwide lockdown, transport restrictions.                                                       | 83                                               | 6287                                           | 137.5                                             |
|        | 2      | 21 <sup>st</sup> September – 27 <sup>th</sup> December | 13             | Some public places re-opened, curfew remained in place.                                                                                   | 59                                               | 27524                                          | 601.7                                             |

183 <sup>1</sup> Each year was classified into 52 weeks and data was analysed by week, the dates included in each period varied slightly from year to  
 184 year, dates provided in the table are those corresponding to the selected weeks in 2020, which defined the periods of analysis. The  
 185 periods of analysis were selected based on COVID-19 case numbers and the implementation of lockdown measures.  
 186

## 187 Patient & public involvement

188 Local health authorities were engaged in the conceptualisation and implementation of the  
 189 study; the public were not involved in the conceptualisation or design of the study. This study was  
 190 approved by the Comite National d’Ethique de la Sante (CNES) of the DRC, the Sierra Leone Ethics  
 191 and Scientific Review committee, the Uganda Virus Research Institute Research Ethics Committee,  
 192 the Uganda National Council for Science and Technology, the London School of Hygiene and Tropical  
 193 Medicine Ethics Committee and local health authorities in each area. No informed consent was  
 194 required for this study as individual level data were not collected.

## 195 **Results**

196 The three settings were distinct in health service organisation and context. Facilities in Goma  
 197 were relatively large, with an average catchment population of 30,000 and on average 12  
 198 registered/trainee nurses per facility in 2020. Masaka facilities served an average of 11,000 people  
 199 and had an average of 4 registered/trainee nurses per facility in 2020. In Kambia, primary healthcare  
 200 facilities were generally small, serving 5,000 people and were staffed by on average just 1  
 201 registered/ trainee nurse alongside supporting staff (community health volunteers, midwives etc;  
 202 **Table 3**).

203 **Table 3. Catchment populations and staffing over time in the selected facilities**

| Facility characteristics                                             | Goma         |                 |                 | Kambia      |                |              | Masaka       |              |              |
|----------------------------------------------------------------------|--------------|-----------------|-----------------|-------------|----------------|--------------|--------------|--------------|--------------|
|                                                                      | 2018         | 2019            | 2020            | 2018        | 2019           | 2020         | 2018         | 2019         | 2020         |
| <b>Catchment population</b>                                          |              |                 |                 |             |                |              |              |              |              |
| Mean per facility (s.d.)                                             | 28,048       | 29,137          | 30,011          | 4,493       | 5,113          | 5,078        | 10,076       | 9,622        | 11,399       |
| Range per facility                                                   | 9,820-52,733 | 10,115 – 54,315 | 10,418 - 55,944 | 2,759-7,400 | 1,168 – 17,724 | 1,259-19,318 | 1,652-25,877 | 1,686-26,415 | 1,721-50,381 |
| Number of facilities with data                                       | 21           | 21              | 21              | 15          | 18             | 21           | 24           | 23           | 24           |
| <b>Staff</b>                                                         |              |                 |                 |             |                |              |              |              |              |
| Mean number of <i>registered/trainee nurses</i> per facility (range) | 10.5 (7-18)  | 11.2 (4-21)     | 11.9 (2-21)     | ~           | ~              | 0.7 (0-3)    | ~            | ~            | 3.8 (0-13)   |
| Number of facilities with data                                       | 14           | 15              | 21              | 0           | 0              | 29           | 0            | 0            | 25           |

204 ~: missing data; s.d.: standard deviation



205 Goma, DRC

206 Data were available from all 21 facilities in 2019 and 2020 for all services; some facilities  
207 were missing data for some services in 2018 (**Supplementary figure 1**). Mean counts of service  
208 activity per facility per week were highly variable across all periods and all years (**Supplementary**  
209 **figure 2**). In the calendar period of January-March, point estimates indicate that service activity may  
210 have been increasing across the years (2018, 2019, 2020) for many services (**Supplementary table**  
211 **1**). There were significantly higher numbers of consultations for OPD (relative risk (RR) 1.38 (95%  
212 confidence interval (CI) 1.09-1.74)), DTP3 (RR 1.21 (95%CI 1.07-1.36) and ANC services (RR 1.26  
213 (95%CI 1.07-1.49) in 2020 compared to 2019. There was no evidence of a difference between 2020  
214 and 2019 in the number of consultations for other services in this period.

215 In period 1 of the pandemic (March-July), there was no evidence of a difference in the  
216 number of OPD consultations in 2020 compared to 2019 and this was sustained in periods 2 (July-  
217 October) and 3 (October-December; **Figure 1**). There was some indication that visits to OPD for  
218 respiratory complaints had decreased but malaria OPD visits had increased in period 1 of lockdown,  
219 compared to similar periods in 2018 and 2019, but this difference disappeared in periods 2 and 3.  
220 The number of DTP3 doses delivered in period 1 of the pandemic was 20% higher in 2020 compared  
221 to similar calendar months in 2019 (95%CI 7-36), but there was no evidence of a difference between  
222 2020 and 2019 in periods 2 and 3. The point estimates for the difference in the number of MCV1  
223 doses delivered indicated a 12-18% higher number of doses in 2020 compared to 2019; this was only  
224 statistically significant in period 3 of the pandemic. The number of first ANC visits in period 1 and 3  
225 of the pandemic were 17% (95%CI 4-32%) and 19% (95%CI 2-38) higher than in the same periods in  
226 2019; there was no evidence of a difference in period 2. There was no evidence of a difference in TT  
227 doses delivered, relative to the number delivered in 2019, in any of the calendar periods. There was  
228 evidence of 17% fewer FP consultations in period 1 of the pandemic (95%CI 2-31), but this difference  
229 disappeared in periods 2 and 3. The number of new diagnoses of HIV were 34% lower in both period  
230 1 (95%CI 20-47) and period 2 (95%CI 1-56) of lockdown compared to the same periods the year  
231 before, but this effect disappeared in period 3. There was no evidence of a change in repeat ART  
232 replenishment visits, in any of the periods (**Figure 1**).

233

234 Kambia, Sierra Leone

235 Data were available from 25-29 facilities for all of the major service groups except HIV  
236 services (**Supplementary figure 3**); only 5-6 facilities had data on HIV services for 2018-2020. Data on  
237 whether outpatients were referred to a higher-level facility or treated as outpatients were  
238 incomplete and not analysable. Mean counts of service activity per facility per week were highly

239 variable across all periods and all years (**Supplementary figure 4**). In the pre-pandemic period (Jan-  
240 March), there was no evidence of a difference in the level of activity for any of the services across  
241 any of the three years 2018, 2019 and 2020 (**Supplementary table 2, Figure 2**).

242 In period 1 of the pandemic in Sierra Leone (March-July), there were 18% fewer OPD  
243 consultations, compared to similar periods in 2019; this reduction was sustained in period 2 (July-  
244 December) where there were 29% fewer OPD consultations (95%CI 20-36%) compared to the same  
245 period in 2019. When broken down by diagnosis, there were fewer respiratory and malaria OPD  
246 visits. There were 27% fewer DTP3 doses delivered in period 1 in 2020 compared to 2019 (95%CI 1-  
247 47%); but this difference disappeared in period 2. There was no evidence of a difference in the  
248 number of MCV1 doses delivered, ANC consultations, FP consultations or new HIV diagnoses in 2020  
249 compared to 2019 in any of the periods of analysis, although CI are wide. In period 1 of the  
250 pandemic, there were 38% more repeat ART replenishment visits in 2020 compared to 2019, but this  
251 difference disappeared in period 2.

252

#### 253 Masaka, Uganda

254 Data were available from 20-25 facilities in 2019 and 2020 for most services; some facilities  
255 were missing data for some services in 2018 (**Supplementary figure 5**). HIV service data were only  
256 available from 12 facilities in 2020, compared to 15-16 facilities in 2019. Mean counts of service  
257 activity per facility per week were highly variable across all periods and all years (**Supplementary**  
258 **figure 6**). In the pre-pandemic period (Jan-March), there was no evidence of a difference in the level  
259 of activity for any of the services across any of the three years 2018, 2019 and 2020 (**Supplementary**  
260 **table 3, Figure 3**).

261 In period 1 of the pandemic in Uganda (March-September), there were 35% fewer OPD visits  
262 (95%CI 27-42) in 2020 compared to 2019, and this was sustained into period 2 (September-  
263 December) with 20% fewer OPD visits (95%CI 3-33; **Figure 3**) in 2020 compared to 2019. In period 1  
264 and 2 of the pandemic, point estimates indicate 11-15% fewer DTP3 doses delivered in 2020  
265 compared to 2019, although confidence intervals cross the null. There were 21% fewer MCV1 doses  
266 delivered in period 1 of the pandemic in 2020 compared to 2019 (95%CI 9-32), and this difference  
267 increased in period 2, with 66% fewer MCV1 doses than in the previous year (95%CI 5-88). There was  
268 no evidence of a difference in the number of consultations for ANC, FP or ART replenishment when  
269 comparing 2020 and 2019 service activity in any of the periods of analysis. The number of new HIV  
270 diagnoses in 2020 was half that of 2019, in both period 1 (51% reduction 95%CI 5-75) and period 2  
271 (48% reduction 95%CI 13-68) of the pandemic.

272 Uganda was the only setting to deliver HPV vaccine in the study period. There were 77%  
 273 fewer HPV vaccine doses delivered to girls aged 10 in period 1 of lockdown (March-September  
 274 2020), compared to 2019. This had bounced back with a substantial increase in doses in period 2 of  
 275 lockdown. Overall, the number of first doses of HPV vaccine delivered in each year was similar.

276

277 **Discussion**

278 In this analysis of weekly service activity levels across health facilities in Goma (DRC), Masaka  
 279 (Uganda) and Kambia (Sierra Leone), we observed some reductions in primary care utilization/  
 280 provision during the lockdowns in 2020. The change in activity levels differed across services and  
 281 settings (Table 4).

282 **Table 4. Summary of percentage change in activity comparing 2020 with 2019 activity levels, for**  
 283 **each period of lockdown by area**  
 284

| Area<br>Service | Goma <sup>1</sup> |                |               | Kambia <sup>2</sup> |                 | Masaka <sup>3</sup> |                 |
|-----------------|-------------------|----------------|---------------|---------------------|-----------------|---------------------|-----------------|
|                 | Period 1          | Period 2       | Period 3      | Period 1            | Period 2        | Period 1            | Period 2        |
| OPD             | -6% (-24, +16)    | -21% (-40, +4) | 0 (-17, 21)   | -18% (-6, -28)      | -29% (-20, -36) | -35% (-27, -42)     | -20% (-33, -3)  |
| DTP             | +20 (+7, +36)     | +14% (-2, +32) | -1 (-17, 18)  | -27% (-1, -47)      | -15% (-30, +4)  | -11% ((+2, -42)     | -15% (-31, +4)  |
| MCV             | +12% (-2, +28)    | +9% (-2, +21)  | +18 (3, 34)   | -10% (-39, +30)     | -16% (-34, +7)  | -21% (-9, -32)      | -66% (-88, -5)  |
| ANC             | +17 (+4, +32)     | +5% (-10, +23) | +19 (2, 38)   | -7% (-17, +5)       | +3% (-12, +22)  | -2 (+21, -21)       | +14, (-21, +66) |
| FP              | -17% (-2, -31)    | -2% (-31, +37) | -18 (-44, 18) | +21% (-10, +61)     | +6% (-14, +30)  | -6 (+29, -31)       | +20 (-10, +61)  |
| ART             | 0% (-22, +27)     | -6% (-21, +11) | +9 (-16, 42)  | +38% (+15, +64)     | +10% (-24, +60) | +26% (-17, +90)     | +29 (-7, +78)   |
| new HIV         | -34% (-20, -47)   | -34% (-56, -1) | -8 (-48, 65)  | -19% (-46, +22)     | -15% (-33, +10) | -51% (-5, -75)      | -48 (-68, -13)  |
| HPV dose 1      | ~                 | ~              | ~             | ~                   | ~               | -77% (-43, -81)     | +84% (-9, +372) |

285

286 <sup>1</sup> In Goma, Period 1: 23 Mar – 19 Jul 2020, Period 2: 20 Jul – 18 Oct 2020; Period 3: 19 Oct – 27 Dec.

287 <sup>2</sup> In Kambia, Period 1: 16 Mar – 19 Jul 2020, Period 2: 20 July – 27 Dec 2020.

288 <sup>3</sup> In Masaka, Period 1: 16 Mar – 20 Sept 2020, Period 2: 21 Sept – 27 Dec 2020.

289

290 **In Goma, DRC**, we observed little to no difference in service activity levels in 2020 compared  
 291 to 2019 and 2018. There were a higher number of vaccinations delivered in the pandemic periods of  
 292 2020 compared with 2019. We observed fewer family planning consultations, which is likely to  
 293 reflect a true unmet need as the International Red Cross had discontinued funding family planning in  
 294 Goma in 2020 (pers. Comm. P Obody). The reduction in HIV diagnoses reflects a reported stockout  
 295 of diagnostic tests for HIV during the COVID 19 pandemic. The limited impact of the pandemic on  
 296 routine primary healthcare utilisation or provision was surprising considering that qualitative data  
 297 provided by healthcare workers described reduced staffing and disrupted services during this period  
 298 (M. James et al. *manuscript in preparation*). Qualitative data from community members suggested

299 some distrust among community members and fears that if they attended facilities, they might be  
300 forcibly quarantined, infected with COVID-19 or given the vaccine (F. Zalwango et al. *manuscript in*  
301 *preparation*). However, our findings may be explained by other qualitative data reflecting the  
302 perceived low risk of COVID-19 disease within a health system which was only just emerging from a  
303 recent Ebola epidemic(16), and past expertise in responding to outbreaks of public health concern.  
304 Temperature screening and infection prevention and control measures had been in place in primary  
305 health facilities for some time to screen for Ebola and the community were familiar with these  
306 measures. Among health management, COVID-19 was perceived from the beginning as ‘not as bad  
307 as Ebola’. However, crisis response teams conducted substantial community engagement, delivering  
308 messages on preventative measures and the availability of health services. Cholera vaccination  
309 campaigns, religious leaders and women’s associations were all targeted with educational messages  
310 about COVID-19 and the services available at the health centre. Additionally, the lockdown within  
311 Goma was stringent to begin with but eased relatively quickly and was variably adhered to; crucially,  
312 transport options remained available for people to get to health centres.

313 **In Kambia, Sierra Leone**, we observed some reductions in OPD and DTP3 activity levels  
314 during the pandemic, with approximately 20% fewer OPD consultations and 30% fewer DTP3 doses  
315 delivered in Mar-July 2020 compared to the same period in 2019. Qualitative data from community  
316 members described fears of getting infected at the health facility, forced vaccination and vaccine  
317 side-effects and fears of being diagnosed with COVID-19 and the potential consequences (including  
318 quarantine). Health care workers also reported reduced staffing at facilities. However, experiences  
319 during the Ebola epidemic of 2014-16 may have mitigated some of the impact of lockdown  
320 measures. Social mobilisation campaigns were held to encourage the population to access  
321 healthcare if they needed it for COVID testing, vaccines and routine services. We observed an  
322 increase in HIV ART replenishment visits, potentially explained by health communication messages  
323 at the time that encouraged people living with HIV to attend the facility to collect a 3-month supply  
324 of ART due to uncertainties around service continuation at the beginning of the pandemic.

325 **In Masaka, Uganda**, we observed substantial reductions in service activity for several  
326 services including OPD, DTP3, MCV1, HIV care and HPV vaccination. The lockdown enforced during  
327 the pandemic was stringent and prolonged with reduced transport options and a 7.00pm to  
328 06:30am curfew. Stresses and strains on the health service during the pandemic were substantial.  
329 Healthcare workers were out of station with sickness and quarantine and one reportedly died.  
330 Although the usual outreach for integrated mother and child health services continued and  
331 potentially mitigated the impact of the lockdown on FP, ANC and infant immunisation service  
332 uptake, there was initially no additional budget for additional outreach services e.g. for OPD and HIV

333 care, as it had not been anticipated that these would be needed. Our findings are supported by  
334 another study documenting a 77% decrease in new HIV diagnoses in the first weeks of April 2020  
335 compared to January-March 2020(9); additional to this previous paper, we found that that this  
336 decrease was sustained throughout 2020.

337 HPV vaccine is usually delivered in Uganda via school-based outreach programmes; although  
338 schools remained closed throughout 2020, the MOH supplied a specific grant to support HPV vaccine  
339 delivery through community outreach, integrated with child health days, later in 2020. This  
340 mitigation strategy worked and by the end of the year, the number of girls who had received their  
341 first dose of HPV was no different to previous years. MCV1 was given at these health days but  
342 uptake may have suffered from lack of mobilisation or awareness as provision was substantially  
343 lower in 2020 compared to 2019. Measles catch up campaigns would be recommended in this  
344 setting to avoid outbreaks.

345 The data we report aligns with a worldwide analysis which documented a 9% decrease in  
346 DTP3 doses and a 10% decrease in measles doses delivered across the WHO AFRO region in April  
347 2020(17), a smaller decrease than in other world regions. The reliance on outreach programmes  
348 during times of routine health service delivery, to obtain high immunisation coverage in many  
349 settings, may have mitigated the impact of the pandemic. The level of service disruption is also likely  
350 to be very context specific, and dependent on the local relationships between the health system and  
351 the community, local health system management and the budget available to conduct additional  
352 activities to mitigate impact. A study in Kinshasa found a reduction in measles vaccine coverage in 2  
353 of 4 health zones, with larger hospitals more affected than health centres, but overall there was no  
354 difference in the number of vaccines delivered (18). We found no evidence of an impact on measles  
355 vaccine doses delivered across Goma. In Sierra Leone, data from two facilities in Bo region found a  
356 32% decline in the number of ANC visits(19), whereas data from Kambia region showed no change  
357 in ANC. No impact on OPD visits for malaria was recorded at malaria reference centres in a variety of  
358 regions of Uganda(20), which contrasts with the 20-30% reduction observed in malaria OPD visits in  
359 Masaka. A strength of this analysis was that we focused resources on understanding service  
360 utilisation and provision in distinct settings and had the statistical power to detect effects if there  
361 were any.

362 There are several limitations of this analysis, the before-after design meant that we could  
363 not account for secular trends and there is evidence to suggest increasing catchment populations  
364 and increasing service activity across the three years in Goma. The lack of difference we observed  
365 between the pandemic periods compared to pre-pandemic periods may have been a reduction  
366 compared to what would be expected if 2020 had been 'a normal year'. However, we did not have

367 evidence of increased catchment populations or increasing activity levels over time for Masaka or  
368 Kambia. We assessed the comparability of the years of analysis with respect to climate factors and  
369 found no evidence of a difference in average maximum or minimum temperatures or atmospheric  
370 pressure between the years, by period. However, data were only available from international  
371 airport weather stations so do not account for local climate variations. We focused this analysis on  
372 government facilities so that recommendations were relevant to Ministry of Health officials;  
373 however, this means we do not have any evidence of whether the reductions in utilisation of  
374 government facilities coincided with an increase in the use of private or traditional health providers.  
375 Qualitative data in the DRC suggest the population may have opted to go to pharmacies, traditional  
376 practitioners, or private health structures in the belief that the state COVID testing and subsequent  
377 quarantine requirements, would be less strictly enforced.

378 We did not measure whether the vaccine doses were delivered via outreach or via routine  
379 services and therefore cannot estimate the extent to which service continuity relied on outreach  
380 during this time nor make any recommendations on continued outreach in these contexts, although  
381 health management stakeholders in Uganda suggest outreach mitigated some of the impact of the  
382 disruption to routine services. We assume catchment populations are relatively stable over time in  
383 order to compare utilisation across years with count data. There are limited data on population  
384 movement in and out of our study areas during the period of the study; however, some reports  
385 from Uganda indicate that there could have been population movement into Masaka from nearby  
386 cities in 2020, thus increasing the population, but this was transient and the effect was reported to  
387 last for only a few months (21, 22).

388

### 389 **Conclusion**

390 We report evidence of disruptions to primary healthcare provision and utilization during the COVID-  
391 19 pandemic in three distinct settings: Goma, DRC; Kambia, Sierra Leone; and Masaka, Uganda. We  
392 found 20-50% fewer consultations for some essential primary healthcare services. The extent of the  
393 disruption and the services affected differed across these different settings. The level of disruption  
394 appeared to correlate with the strength of lockdown measures in the different settings and  
395 community attitudes towards the risk posed by COVID-19 especially in contexts with a history of  
396 Ebola outbreak responses. Mitigation strategies such as health communication campaigns and  
397 outreach services proved important to limit the impact of lockdowns on primary healthcare services.

398

399

### 400 **Acknowledgements**

401 We thank the data collection teams, the health facility staff and the Ministry of Health officials in the  
402 study countries for facilitating the collection of this data.

403

#### 404 **Author contributions**

405 **Conceived & designed the project:** K Gallagher, D Watson-Jones, B Greenwood, B Leigh, H Kavunga,  
406 E Ruzagira.

407 **Collected/ generated project data:** K Kasonia, D Tindanbil, J Kitonsa, F Zalwango, L Enria, A

408 Mansaray, M James, Y Nije, D Tetsa Tata, B Lawal, A Drammeh, D Mukadi

409 **Contributed data/ analytic tools:** Kathy Baisley

410 **Performed the analysis:** K Gallagher

411 **Initial draft:** K. Kasonia, D Tindanbil

412 **Revise and review of all drafts:** K Kasonia, D Tindanbil, J Kitonsa, K Baisley, F Zalwango, L Enria, A

413 Mansaray, M James, Y Nije, D Tetsa Tata, B Lawal, A Drammeh, B Lowe, D Mukadi, S Mounier-Jack, F

414 Nakiyimba, P Obady, J Muhavi, B Greenwood, D Samai, B Leigh, D Watson-Jones, H Kavunga, E

415 Ruzagira , K Gallagher

416

#### 417 **Funding**

418 This project was funded by a UKRI (MRC), DHSC (NIHR) research grant (GEC1017, MR/V029363/1, PI  
419 Katherine Gallagher)

420

#### 421 **Conflict of Interest**

422 All authors: no reported conflicts

423

#### 424 **Figure legends**

425 **Figure 1. The percentage change in activity levels in 2020 compared to 2019, for each outcome, in**  
426 **each period, in Goma<sup>1</sup>**

427

428 <sup>1</sup> The percentage change was calculated as  $(1-RR_{2020/2019}) * 100$ ; the RRs for 2018 vs 2019 and 2019 vs  
429 2020 are included in Supplementary Table 1

430

431 **Figure 2. The percentage change in activity levels in 2020 compared to 2019, for each outcome, in**  
432 **each period, in Kambia, Sierra Leone<sup>1</sup>**

433

434 <sup>1</sup> The percentage change was calculated as  $(1-RR_{2020/2019}) * 100$ ; the RRs for 2018 vs 2019 and 2019 vs  
435 2020 are included in Supplementary Table 2

436

437 **Figure 3. The percentage change in activity levels in 2020 compared to 2019, for each outcome, in**  
438 **each period, in Masaka, Uganda<sup>1</sup>**  
439



440

441 **References**

442

- 443 1. World Health Organization. Pulse survey on continuity of essential health services during the  
444 COVID-19 pandemic. Interim report. 27 August. World Health Organization; 2020.
- 445 2. World Health Organization. Second round of national pulse survey on continuity of essential  
446 health services during the COVID-19 pandemic. 23rd April, 2021. 2021. Report No.: WHO/2019-  
447 nCoV/EHS\_continuity/survey/2021.1.
- 448 3. Hale T, Angrist N, Goldszmidt R, Kira B, Petherick A, Phillips T, et al. A global panel database  
449 of pandemic policies (Oxford COVID-19 Government Response Tracker). *Nature Human Behaviour*.  
450 2021;5(4):529-38.
- 451 4. Lim J, Broughan J, Crowley D, O'Kelly B, Fawsitt R, Burke MC, et al. COVID-19's impact on  
452 primary care and related mitigation strategies: A scoping review. *Eur J Gen Pract*. 2021;27(1):166-75.
- 453 5. Vaccaro C, Mahmoud F, Aboulatta L, Aloud B, Eltonsy S. The impact of COVID-19 first wave  
454 national lockdowns on perinatal outcomes: a rapid review and meta-analysis. *BMC Pregnancy and  
455 Childbirth*. 2021;21(1):676.
- 456 6. McDonald HI, Tessier E, White JM, Woodruff M, Knowles C, Bates C, et al. Early impact of the  
457 coronavirus disease (COVID-19) pandemic and physical distancing measures on routine childhood  
458 vaccinations in England, January to April 2020. *Euro surveillance : bulletin Europeen sur les maladies  
459 transmissibles = European communicable disease bulletin*. 2020;25(19).
- 460 7. Miller HE, Henkel A, Leonard SA, Miller SE, Tran L, Bianco K, et al. The impact of the COVID-  
461 19 pandemic on postpartum contraception planning. *American journal of obstetrics & gynecology  
462 MFM*. 2021;3(5):100412-.
- 463 8. Wanyana D, Wong R, Hakizimana D. Rapid assessment on the utilization of maternal and  
464 child health services during COVID-19 in Rwanda. *Public Health Action*. 2021;11(1):12-21.
- 465 9. Bell D, Hansen KS, Kiragga AN, Kambugu A, Kissa J, Mbonye AK. Predicting the Impact of  
466 COVID-19 and the Potential Impact of the Public Health Response on Disease Burden in Uganda. *Am  
467 J Trop Med Hyg*. 2020;103(3):1191-7.
- 468 10. COVID-19; PfE-BRt. Effective implementation of Public Health and Social Measures in  
469 Uganda and DR Congo: Situational Analysis. Second data collection, 19th August, 2020. Finding the  
470 Balance: Public Health and social measures in Uganda and DR Congo 3rd data collection. 2020.
- 471 11. The Government of Sierra Leone Ministry of Health & Sanitation. The Ministry of Health &  
472 Sanitation, Sierra Leone <https://mohs.gov.sl/> [Last accessed 07April2022] 2022 [
- 473 12. The Government of Uganda. The Government of Uganda COVID-19 Response Information  
474 Hub <https://covid19.gou.go.ug/timeline.html> [last accessed 07April2022] 2022 [
- 475 13. Harris PA, Taylor R, Minor BL, Elliott V, Fernandez M, O'Neal L, et al. The REDCap consortium:  
476 Building an international community of software platform partners. *J Biomed Inform*.  
477 2019;95:103208.
- 478 14. Harris PA, Taylor R, Thielke R, Payne J, Gonzalez N, Conde JG. Research electronic data  
479 capture (REDCap)--a metadata-driven methodology and workflow process for providing translational  
480 research informatics support. *J Biomed Inform*. 2009;42(2):377-81.
- 481 15. Hannah Ritchie, Edouard Mathieu, Lucas Rodés-Guirao, Cameron Appel, Charlie Giattino,  
482 Esteban Ortiz-Ospina, et al. "Coronavirus Pandemic (COVID-19)". Published online at  
483 OurWorldInData.org. Retrieved from: '<https://ourworldindata.org/coronavirus>' [Online Resource,  
484 last accessed 07April22] 2020 [
- 485 16. World Health Organization. Situation report: Ebola outbreak 2018-2020 - North Kivu-Ituri  
486 <https://www.who.int/emergencies/situations/Ebola-2019-drc-> [last accessed 07April2022] 2021 [

- 487 17. Shet A, Carr K, Danovaro-Holliday MC, Sodha SV, Prospero C, Wunderlich J, et al. Impact of  
488 the SARS-CoV-2 pandemic on routine immunisation services: evidence of disruption and recovery  
489 from 170 countries and territories. *The Lancet Global Health*. 2022;10(2):e186-e94.
- 490 18. Hategeka C, Carter SE, Chenge FM, Katanga EN, Lurton G, Mayaka SM-N, et al. Impact of the  
491 COVID-19 pandemic and response on the utilisation of health services in public facilities during the  
492 first wave in Kinshasa, the Democratic Republic of the Congo. *BMJ Global Health*.  
493 2021;6(7):e005955.
- 494 19. Aranda Z, Binde T, Tashman K, Tadikonda A, Mawindo B, Maweu D, et al. Disruptions in  
495 maternal health service use during the COVID-19 pandemic in 2020: experiences from 37 health  
496 facilities in low-income and middle-income countries. *BMJ Global Health*. 2022;7(1):e007247.
- 497 20. Namuganga JF, Briggs J, Roh ME, Okiring J, Kisambira Y, Sserwanga A, et al. Impact of COVID-  
498 19 on routine malaria indicators in rural Uganda: an interrupted time series analysis. *Malaria journal*.  
499 2021;20(1):475.
- 500 21. Charles Onyango-Obbo. Urban-Rural migration opens up countryside to COVID-19 refugees.  
501 09 May 2020 [[https://www.theeastafrican.co.ke/tea/oped/comment/urban-rural-migration-opens-](https://www.theeastafrican.co.ke/tea/oped/comment/urban-rural-migration-opens-up-countryside-to-covid-19-refugees--1441052)  
502 [up-countryside-to-covid-19-refugees--1441052](https://www.theeastafrican.co.ke/tea/oped/comment/urban-rural-migration-opens-up-countryside-to-covid-19-refugees--1441052)]. 2020.
- 503 22. UNHABITAT. COVID-19 through the Lens of Urban Rural Linkages - Guiding Principles and  
504 Framework for Action (URL-GP)  
505 [[https://unhabitat.org/sites/default/files/2020/07/issue\\_brief\\_covid-](https://unhabitat.org/sites/default/files/2020/07/issue_brief_covid-19_through_the_lens_of_urban_rural_linkages_web_revised.pdf)  
506 [19 through the lens of urban rural linkages web revised.pdf](https://unhabitat.org/sites/default/files/2020/07/issue_brief_covid-19_through_the_lens_of_urban_rural_linkages_web_revised.pdf)]. 2020.  
507

## The impact of the COVID-19 pandemic on the provision & utilisation of primary health care services in Goma, Democratic Republic of Congo, Kambia, Sierra Leone & Masaka, Uganda

### Figures

Figure 1. The percentage change in activity levels in 2020 compared to 2019, for each outcome, in each period, in Goma<sup>1</sup>

<sup>1</sup>The percentage change was calculated as  $(1-RR_{2020/2019}) * 100$ ; the RRs for 2018 vs 2019 and 2019 vs 2020 are included in Supplementary Table 1

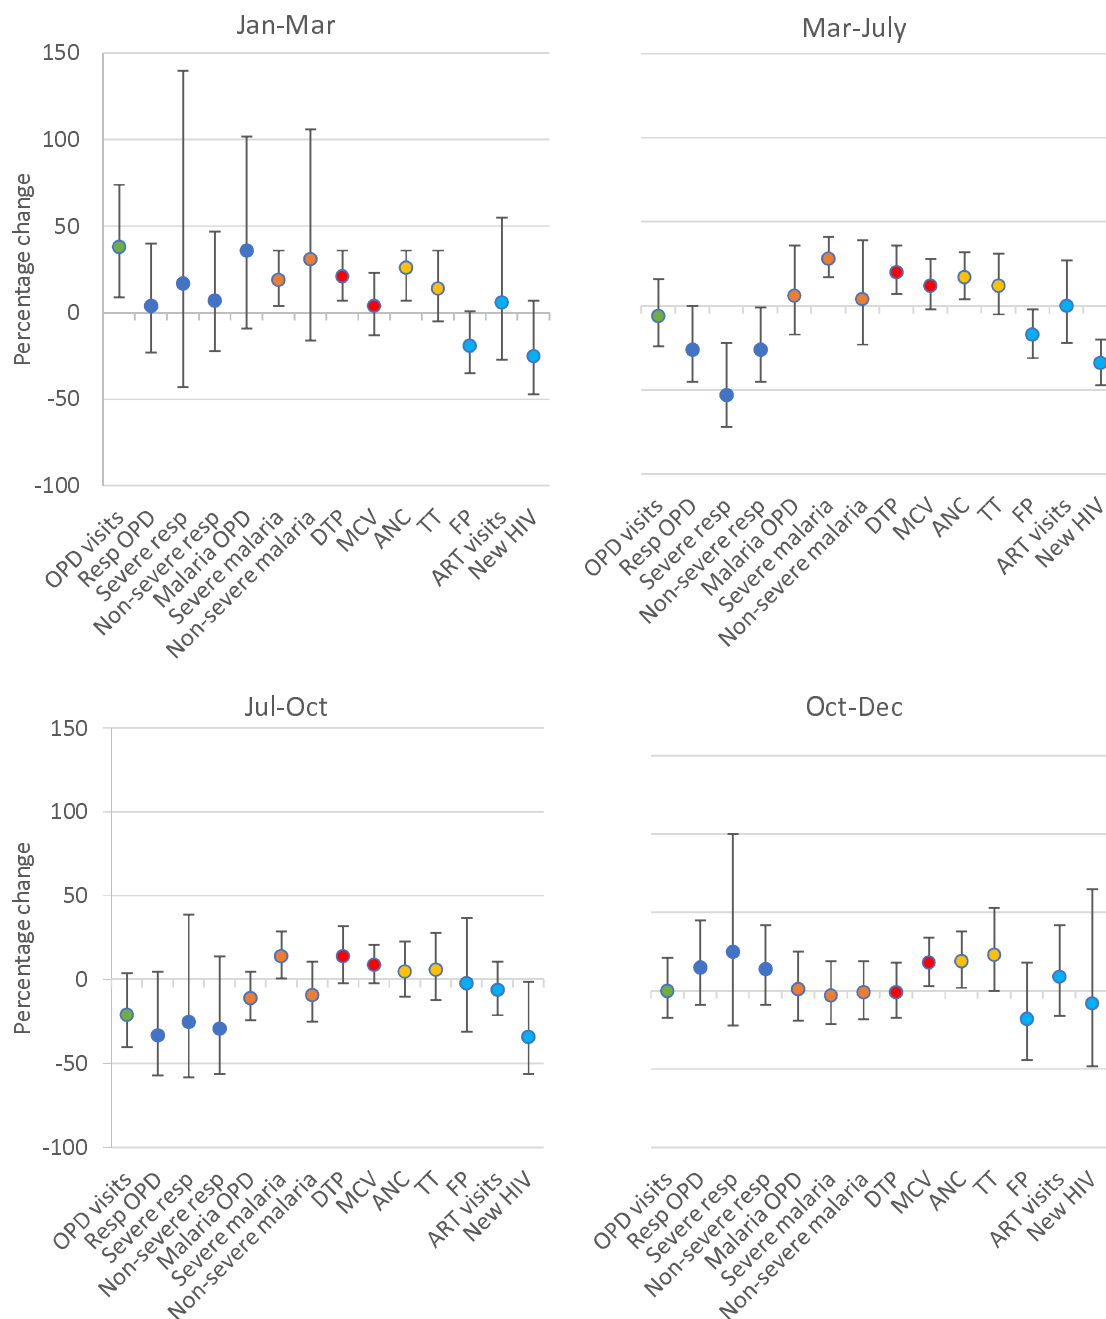

Figure 2. **The percentage change in activity levels in 2020 compared to 2019, for each outcome, in each period, in Kambia, Sierra Leone<sup>1</sup>**

<sup>1</sup>The percentage change was calculated as  $(1-RR_{2020/2019}) * 100$ ; the RRs for 2018 vs 2019 and 2019 vs 2020 are included in Supplementary Table 2

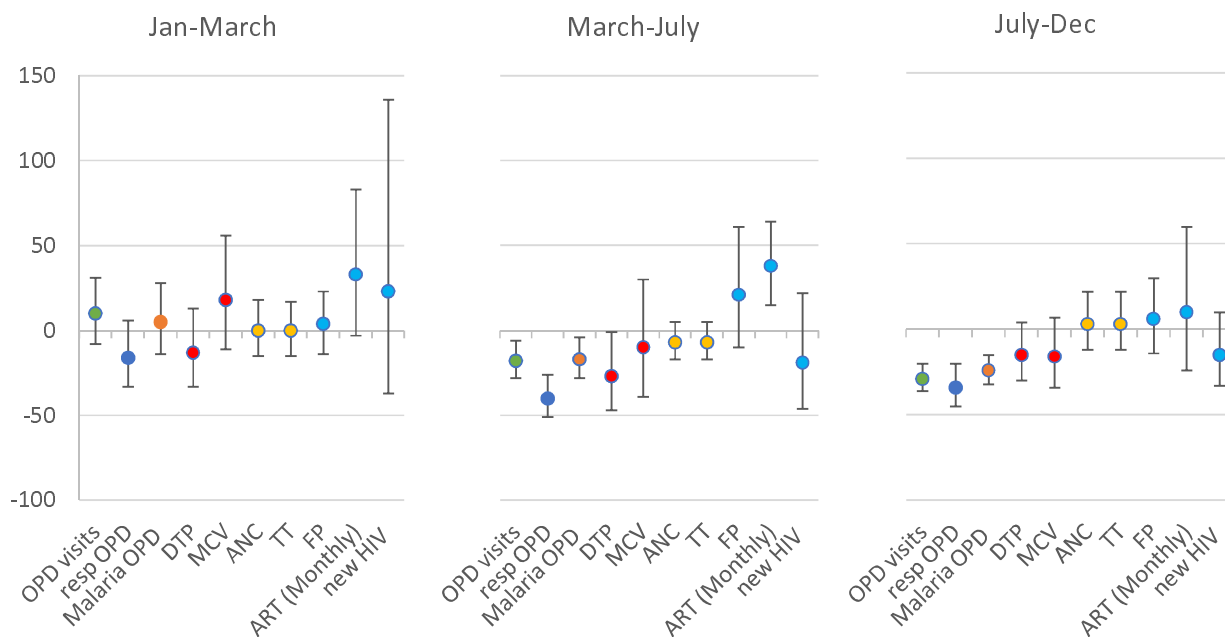



Figure 3. The percentage change in activity levels in 2020 compared to 2019, for each outcome, in each period, in Masaka, Uganda<sup>1</sup>

<sup>1</sup>The percentage change was calculated as  $(1-RR_{2020/2019}) * 100$ ; the RRs for 2018 vs 2019 and 2019 vs 2020 are included in Supplementary Table 3

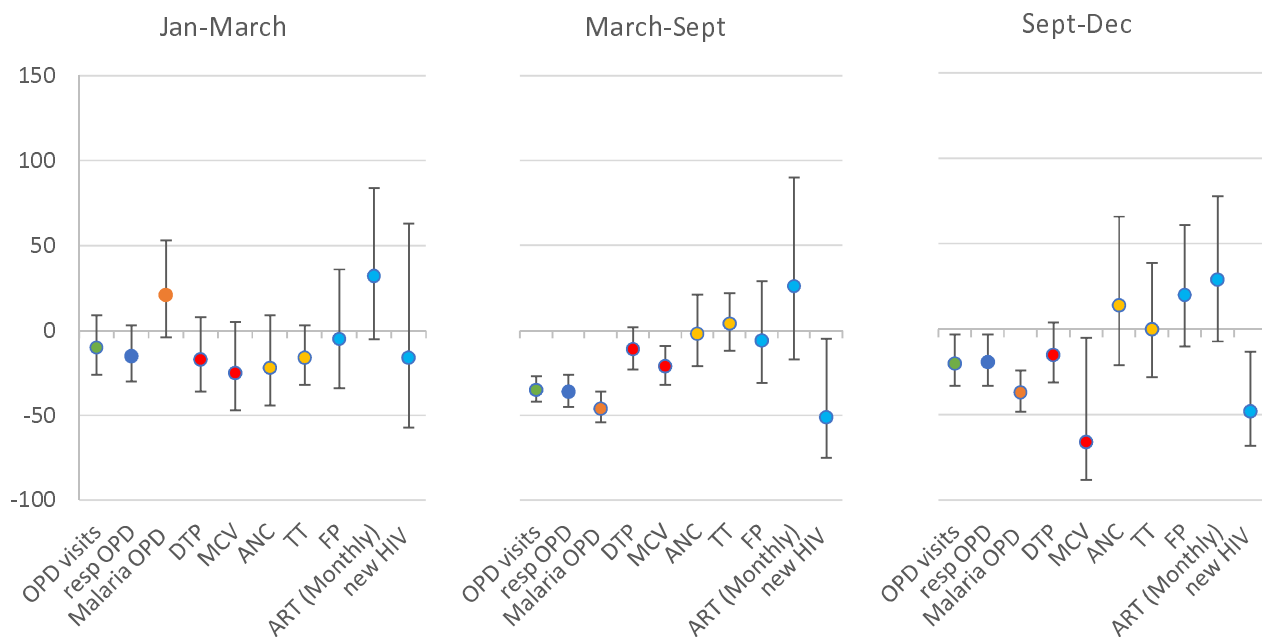

Source: https://medrxiv.org/content/10.1101/2022.04.28.22274416v1.full.pdf
